# Supplementary material for: Backbone flexibility of extended metal atom chains. Ab initio molecular dynamics for Cr3(dpa)4X2 (X = NCS, CN, NO3) in gas and crystalline phases
Source: Royal Society of Chemistry journal article supplement (doi:10.1039/c7dt03520a), 2017-01-01
Supplement: c7dt03520a1.pdf [file c7dt03520a1.pdf]

**Supporting Information for**

**Backbone flexibility of extended metal atom  
chains. Ab initio molecular dynamics for  
 $\text{Cr}_3(\text{dpa})_4\text{X}_2$  ( $\text{X} = \text{NCS}^-$ ,  $\text{CN}^-$ ,  $\text{NO}_3^-$ ) in gas and  
crystalline phase.**

*Mariano Spivak,<sup>1</sup> Vaida Arcisauskaite,<sup>2</sup> Xavier López,<sup>1</sup> and Coen de Graaf<sup>1,3</sup>*

<sup>1</sup>Departament de Química Física i Inorgànica, Universitat Rovira i Virgili, Marcel·lí Domingo 1, E-43007 Tarragona, Spain.

<sup>2</sup>Department of Chemistry, Inorganic Chemistry Laboratory, University of Oxford, South Parks Road, Oxford OX1 3QR, U.K.

<sup>3</sup>ICREA, Passeig Lluís Companys 23, 08010, Barcelona, Spain.

**Table of contents:**

|          |                                                                                                                                                |   |
|----------|------------------------------------------------------------------------------------------------------------------------------------------------|---|
| Table S1 | Relevant mean distances ( $d$ , in Å) and angles ( $a$ , in degrees) from the molecular dynamics of $\text{Cr}_3(\text{dpa})_4(\text{CN})_2$ . | 2 |
|----------|------------------------------------------------------------------------------------------------------------------------------------------------|---|

Table S1. Relevant mean distances ( $d$ , in Å) and angles ( $a$ , in degrees) from the molecular dynamics of  $\text{Cr}_3(\text{dpa})_4(\text{CN})_2$ . Average values are reported for the group of symmetric ( $\Delta\text{dist} < 0.15$  Å) and asymmetric ( $\Delta\text{dist} > 0.15$  Å) structures. X-ray values are shown. Previous DFT optimized structural parameters are shown for comparison.

|                                   | Gas phase MD  |                | Crystal MD    |                | X-ray <sup>1</sup> | Static DFT Opt <sup>2</sup> |
|-----------------------------------|---------------|----------------|---------------|----------------|--------------------|-----------------------------|
|                                   | Symmetri<br>c | Asymmetri<br>c | Symmetri<br>c | Asymmetri<br>c |                    |                             |
| $d(\text{Cr}_1\text{-Cr}_2)$      | 2.314         | 2.275          | 2.358         | 1.928          | 2.370              | 2.370                       |
| $d(\text{Cr}_2\cdots\text{Cr}_3)$ | 2.332         | 2.531          | 2.379         | 2.695          | 2.370              | 2.370                       |
| $d(\text{X-Cr}_1)$                | 2.187         | 2.198          | 2.323         | 2.452          | 2.284              | 2.186                       |
| $d(\text{X-Cr}_3)$                | 2.176         | 2.135          | 2.201         | 2.299          | 2.284              | 2.186                       |
| $a(\text{N-C-Cr}_1)$              | 164.6         | 165.5          | 145.3         | 145.6          | 173.7              | 180.0                       |
| $a(\text{N-C-Cr}_3)$              | 164.2         | 164.8          | 139.7         | 147.6          | 173.7              | 180.0                       |

- (1) John F. Berry; F. Albert Cotton; Tongbu Lu; Carlos A. Murillo; Brian K. Roberts; Wang, X. Molecular and Electronic Structures by Design: Tuning Symmetrical and Unsymmetrical Linear Trichromium Chains. *J. Am. Chem. Soc.* **2004**, *126* (22), 7082–7096.
- (2) Spivak, M.; Arcisauskaite, V.; Lopez, X.; McGrady, J. E.; de Graaf, C. A Multiconfigurational Approach to the Electronic Structure of Trichromium Extended Metal Atom Chains. *Dalt. Trans.* **2017**, *46* (19), 6202–6211.
